# Supplementary material
Source: PubMed Central journal article supplement (PMC2657343)
Supplement: NIHMS88269-supplement-supplements.pdf [file NIHMS88269-supplement-supplements.pdf]

**Supplemental Tables 5-8:**

Haplotype tables using a 2, 4, 5, or 6 SNP sliding window. Black highlights represent haplotypes that are significantly associated with AD, while gray highlights represent haplotypes that are protective. As was evident with the 3 SNP window analyses (see main text and Table 4) there was a general clustering of significant results near SNPs 8-10 at the 5' end in the Caribbean Hispanics, and near SNPs 22-25 at the 3' end in the North Europeans and MIRAGE African American cohorts.

Supplemental Table 5

| SNP  |     | Discovery Datasets      |      |              |             |              |                             |              |              |               |               | Replication Datasets      |                 |              |               |                |                             |                 |              |              |               |                        |               |              |             |               |                               |              |           |               |               |       |              |
|------|-----|-------------------------|------|--------------|-------------|--------------|-----------------------------|--------------|--------------|---------------|---------------|---------------------------|-----------------|--------------|---------------|----------------|-----------------------------|-----------------|--------------|--------------|---------------|------------------------|---------------|--------------|-------------|---------------|-------------------------------|--------------|-----------|---------------|---------------|-------|--------------|
| SNP# | HAP | North European Families |      |              |             |              | Caribbean Hispanic Families |              |              |               |               | Israeli Arab case:control |                 |              |               |                | North European case:control |                 |              |              |               | MIRAGE Caucasians Sibs |               |              |             |               | MIRAGE African-Americans Sibs |              |           |               |               |       |              |
|      |     | Hap frequency           | Info | Z            | Hap p-value | Global sim p | Hap frequency               | Info         | Z            | Hap p-value   | Global sim p  | Control frequency         | Cases frequency | Z            | Hap p-value   | Global sim p   | Control frequency           | Cases frequency | Z            | Hap p-value  | Global sim p  | Hap frequency          | Info          | Z            | Hap p-value | Global sim p  | Hap frequency                 | Info         | Z         | Hap p-value   | Global sim p  |       |              |
| 1    | 2   | A                       | C    | 0.522        | 52          | -1.978       | <b>0.048</b>                | 0.117        | 0.310        | 70            | -0.669        | 0.503                     | 0.625           | 0.416        | 0.353         | -1.335         | 0.182                       | <b>0.019</b>    | ND           | ND           | ND            | ND                     | ND            | 0.506        | 67          | -0.564        | 0.573                         | 0.885        | 0.065     | 27            | -1.577        | 0.115 | <b>0.012</b> |
| 1    | 2   | A                       | G    | 0.298        | 47          | 0.932        | 0.351                       | 0.286        | 65           | -0.415        | 0.678         |                           | <b>0.342</b>    | <b>0.573</b> | <b>2.659</b>  | <b>0.0078</b>  |                             |                 | ND           | ND           | ND            | ND                     | ND            | 0.286        | 61          | -0.010        | 0.992                         | <b>0.346</b> | <b>42</b> | <b>-2.008</b> | <b>0.045</b>  |       |              |
| 1    | 2   | G                       | G    | 0.180        | 36          | 1.317        | 0.188                       | 0.401        | 66           | 1.018         | 0.309         |                           | 0.229           | 0.175        | -1.398        | 0.162          |                             |                 | ND           | ND           | ND            | ND                     | ND            | 0.205        | 65          | -0.599        | 0.549                         | 0.579        | 50        | 2.712         | <b>0.0067</b> |       |              |
| 3    | 4   | A                       | T    | 0.506        | 53          | -0.911       | 0.362                       | 0.289        | 0.498        | 97            | 0.033         | 0.973                     | 0.978           | <b>0.489</b> | <b>0.573</b>  | <b>2.028</b>   | <b>0.043</b>                | <b>0.019</b>    | <b>0.511</b> | <b>0.630</b> | <b>2.759</b>  | <b>0.0058</b>          | <b>0.013</b>  | 0.530        | 84          | 0.161         | 0.872                         | 0.236        | 0.412     | 43            | -0.749        | 0.454 | 0.582        |
| 3    | 4   | A                       | C    | 0.357        | 54          | 1.678        | 0.093                       | 0.273        | 72           | -0.128        | 0.898         |                           | 0.319           | 0.225        | -2.604        | <b>0.0092</b>  |                             |                 | 0.349        | 0.271        | -1.754        | 0.079                  |               | 0.372        | 84          | 0.841         | 0.400                         | 0.076        | 23        | -0.709        | 0.479         |       |              |
| 3    | 4   | G                       | T    | 0.078        | 17          | -1.188       | 0.235                       | 0.126        | 51           | 0.400         | 0.689         |                           | 0.105           | 0.156        | 1.388         | 0.165          |                             |                 | <b>0.086</b> | <b>0.030</b> | <b>-2.162</b> | <b>0.031</b>           |               | <b>0.041</b> | <b>20</b>   | <b>-2.186</b> | <b>0.029</b>                  | 0.347        | 46        | -1.148        | 0.882         |       |              |
| 4    | 5   | T                       | C    | 0.307        | 54          | -1.785       | 0.074                       | 0.217        | 0.198        | 61            | -0.142        | 0.887                     | 0.968           | <b>0.249</b> | <b>0.398</b>  | <b>3.242</b>   | <b>0.0012</b>               | <b>0.0017</b>   | <b>0.321</b> | <b>0.411</b> | <b>2.269</b>  | <b>0.023</b>           | 0.108         | 0.311        | 67          | -1.403        | 0.161                         | 0.513        | 0.112     | 35            | -0.079        | 0.937 | 0.761        |
| 4    | 5   | C                       | T    | 0.360        | 55          | 1.563        | 0.118                       | 0.364        | 84           | 0.112         | 0.911         |                           | 0.381           | 0.247        | -3.242        | <b>0.0012</b>  |                             |                 | 0.341        | 0.298        | -1.565        | 0.118                  |               | 0.386        | 69          | 0.960         | 0.337                         | 0.232        | 41        | 0.645         | 0.519         |       |              |
| 5    | 6   | T                       | A    | 0.343        | 56          | 1.194        | 0.232                       | 0.509        | 0.307        | 83            | -0.491        | 0.623                     | 0.424           | 0.345        | 0.268         | -2.035         | <b>0.042</b>                | <b>0.0085</b>   | 0.336        | 0.292        | -1.374        | 0.170                  | 0.367         | 0.368        | 71          | 0.307         | 0.759                         | 0.582        | 0.221     | 50            | 0.404         | 0.687 | 0.920        |
| 5    | 6   | C                       | T    | 0.364        | 58          | -1.304       | 0.192                       | 0.188        | 62           | -0.081        | 0.936         |                           | 0.249           | 0.405        | 3.312         | <b>0.00093</b> |                             |                 | 0.353        | 0.421        | 1.791         | 0.073                  |               | 0.332        | 68          | -0.934        | 0.350                         | 0.110        | 39        | -0.651        | 0.515         |       |              |
| 6    | 7   | A                       | A    | 0.339        | 54          | 1.119        | 0.263                       | 0.252        | 0.324        | 87            | -1.041        | 0.298                     | 0.246           | 0.372        | 0.279         | -2.132         | <b>0.033</b>                | <b>0.044</b>    | 0.357        | 0.309        | -1.441        | 0.150                  | 0.239         | 0.361        | 71          | 1.403         | 0.161                         | 0.299        | 0.241     | 52            | 0.134         | 0.894 | 0.595        |
| 6    | 7   | T                       | G    | 0.534        | 58          | -1.668       | 0.095                       | 0.513        | 86           | 1.888         | 0.059         |                           | 0.499           | 0.620        | 2.435         | <b>0.015</b>   |                             |                 | 0.522        | 0.592        | 1.900         | 0.057                  |               | 0.443        | 74          | -0.348        | 0.728                         | 0.538        | 51        | -1.012        | 0.311         |       |              |
| 7    | 8   | G                       | C    | 0.526        | 53          | -1.803       | 0.071                       | 0.185        | 0.501        | 87            | 1.922         | 0.055                     | 0.051           | <b>0.499</b> | <b>0.620</b>  | <b>2.476</b>   | <b>0.013</b>                | <b>0.017</b>    | <b>0.527</b> | <b>0.601</b> | <b>-1.974</b> | <b>0.048</b>           | 0.206         | 0.432        | 78          | -0.755        | 0.450                         | 0.400        | 0.553     | 55            | -0.724        | 0.469 | 0.786        |
| 7    | 8   | A                       | T    | 0.419        | 54          | 1.185        | 0.236                       | <b>0.371</b> | <b>88</b>    | <b>-2.168</b> | <b>0.030</b>  |                           | <b>0.459</b>    | <b>0.322</b> | <b>-2.934</b> | <b>0.0033</b>  |                             |                 | <b>0.428</b> | <b>0.349</b> | <b>-2.092</b> | <b>0.036</b>           |               | 0.392        | 75          | 1.484         | 0.138                         | 0.252        | 51        | 0.089         | 0.929         |       |              |
| 8    | 9   | C                       | G    | 0.574        | 52          | -0.522       | 0.602                       | 0.562        | <b>0.629</b> | <b>75</b>     | <b>2.829</b>  | <b>0.0047</b>             | <b>0.0048</b>   | <b>0.534</b> | <b>0.659</b>  | <b>2.665</b>   | <b>0.0077</b>               | <b>0.018</b>    | <b>0.570</b> | <b>0.640</b> | <b>1.914</b>  | <b>0.056</b>           | <b>0.046</b>  | 0.447        | 64          | -0.942        | 0.346                         | 0.366        | 0.461     | 55            | 0.169         | 0.866 | 0.995        |
| 8    | 9   | T                       | A    | 0.411        | 52          | 0.615        | 0.538                       | <b>0.349</b> | <b>74</b>    | <b>-2.347</b> | <b>0.019</b>  |                           | <b>0.447</b>    | <b>0.313</b> | <b>-2.903</b> | <b>0.0037</b>  |                             |                 | 0.417        | 0.349        | -1.862        | 0.063                  |               | 0.222        | 55          | 0.094         | 0.925                         | 0.128        | 30        | -0.025        | 0.980         |       |              |
| 8    | 9   | T                       | G    | 0.004        | 0           | *            | *                           | 0.010        | 2            | *             | *             |                           | 0.010           | 0.014        | 0.329         | 0.742          |                             |                 | *            | *            | *             | *                      |               | 0.204        | 34          | 1.801         | 0.072                         | 0.122        | 29        | -0.262        | 0.793         |       |              |
| 9    | 10  | G                       | C    | 0.571        | 54          | -0.184       | 0.854                       | 0.181        | <b>0.635</b> | <b>81</b>     | <b>2.633</b>  | <b>0.0085</b>             | <b>0.013</b>    | <b>0.539</b> | <b>0.658</b>  | <b>2.563</b>   | <b>0.010</b>                | <b>0.044</b>    | <b>0.569</b> | <b>0.646</b> | <b>2.125</b>  | <b>0.034</b>           | 0.070         | 0.438        | 61          | -0.322        | 0.747                         | 0.854        | 0.490     | 51            | -0.105        | 0.916 | 0.989        |
| 9    | 10  | A                       | T    | 0.407        | 54          | 0.680        | 0.497                       | <b>0.337</b> | <b>78</b>    | <b>-2.479</b> | <b>0.013</b>  |                           | <b>0.438</b>    | <b>0.313</b> | <b>-2.714</b> | <b>0.0067</b>  |                             |                 | 0.417        | 0.351        | -1.842        | 0.066                  |               | 0.228        | 53          | -0.158        | 0.875                         | 0.122        | 26        | 0.317         | 0.751         |       |              |
| 10   | 11  | T                       | A    | 0.410        | 57          | 0.965        | 0.335                       | 0.478        | 0.366        | 89            | -1.527        | 0.127                     | 0.094           | <b>0.418</b> | <b>0.265</b>  | <b>-3.187</b>  | <b>0.0014</b>               | <b>0.0037</b>   | <b>0.395</b> | <b>0.322</b> | <b>-1.961</b> | <b>0.050</b>           | 0.244         | 0.465        | 75          | -0.330        | 0.742                         | 0.655        | 0.193     | 39            | 1.039         | 0.299 | 0.440        |
| 10   | 11  | C                       | C    | 0.389        | 59          | -1.381       | 0.167                       | 0.206        | 66           | -1.062        | 0.288         |                           | 0.281           | 0.423        | 3.067         | <b>0.0022</b>  |                             |                 | 0.396        | 0.457        | 1.748         | 0.080                  |               | 0.359        | 75          | -0.400        | 0.689                         | 0.105        | 36        | -0.505        | 0.613         |       |              |
| 10   | 11  | C                       | A    | 0.181        | 43          | 0.330        | 0.742                       | 0.206        | 66           | 2.220         | <b>0.026</b>  |                           | 0.271           | 0.262        | -0.268        | 0.789          |                             |                 | 0.188        | 0.193        | 0.222         | 0.825                  |               | 0.157        | 53          | 1.039         | 0.299                         | 0.694        | 51        | -0.167        | 0.867         |       |              |
| 11   | 12  | C                       | C    | 0.556        | 55          | -0.034       | 0.973                       | 0.199        | 0.706        | 67            | 0.112         | 0.911                     | 0.948           | <b>0.690</b> | <b>0.528</b>  | <b>-3.146</b>  | <b>0.0017</b>               | <b>0.0015</b>   | <b>0.544</b> | <b>0.463</b> | <b>-1.971</b> | <b>0.049</b>           | 0.090         | 0.590        | 68          | 0.386         | 0.700                         | 0.834        | 0.828     | 40            | 0.046         | 0.963 | 0.607        |
| 11   | 12  | C                       | C    | 0.406        | 54          | -0.827       | 0.408                       | 0.406        | 0.213        | 67            | 0.169         | 0.866                     |                 | <b>0.310</b> | <b>0.472</b>  | <b>3.146</b>   | <b>0.0017</b>               |                 | <b>0.407</b> | <b>0.497</b> | <b>2.225</b>  | <b>0.026</b>           | 0.472         | 0.366        | 72          | -0.699        | 0.485                         | 0.104        | 31        | -0.833        | 0.405         |       |              |
| 11   | 12  | A                       | T    | 0.039        | 13          | 2.067        | <b>0.039</b>                | 0.081        | 34           | -0.362        | 0.718         |                           | *               | *            | *             | *              |                             |                 | 0.049        | 0.040        | -0.603        | 0.546                  |               | 0.044        | 21          | 0.480         | 0.631                         | 0.067        | 23        | 0.890         | 0.373         |       |              |
| 12   | 13  | C                       | G    | 0.928        | 11          | -2.254       | <b>0.024</b>                | <b>0.030</b> | 0.928        | 24            | 0.351         | 0.725                     | 0.661           | 1            | 1             | *              | *                           |                 | 0.949        | 0.960        | 0.739         | 0.460                  | 0.821         | 0.961        | 21          | -0.736        | 0.462                         | 0.471        | 0.942     | 25            | -0.934        | 0.350 | 0.412        |
| 12   | 13  | T                       | A    | 0.036        | 11          | 2.254        | <b>0.024</b>                | 0.067        | 24           | -0.125        | 0.901         |                           | 0               | 0            | *             | *              |                             | 0.049           | 0.040        | -0.624       | 0.533         |                        | 0.034         | 22           | 0.905       | 0.366         | 0.047                         | 24           | 0.709     | 0.479         |               |       |              |
| 13   | 14  | G                       | T    | 0.902        | 29          | -0.881       | 0.378                       | 0.063        | 0.803        | 61            | -2.133        | <b>0.033</b>              | <b>0.019</b>    | 0.810        | 0.836         | 0.695          | 0.487                       | 0.482           | 0.868        | 0.843        | -0.846        | 0.397                  | 0.243         | 0.906        | 35          | -1.639        | 0.101                         | 0.235        | 0.885     | 36            | -0.790        | 0.429 | 0.280        |
| 13   | 14  | G                       | C    | 0.061        | 18          | -0.790       | 0.430                       | 0.123        | 50           | 2.611         | <b>0.0090</b> |                           | 0.190           | 0.164        | -0.695        | 0.487          |                             |                 | 0.081        | 0.118        | 1.632         | 0.103                  |               | 0.054        | 21          | 1.455         | 0.146                         | 0.059        | 16        | 0.025         | 0.980         |       |              |
| 13   | 14  | A                       | T    | 0.036        | 12          | 2.660        | <b>0.0078</b>               | 0.070        | 31           | -0.727        | 0.467         |                           | *               | *            | *             | *              |                             |                 | 0.052        | 0.039        | -0.749        | 0.454                  |               | 0.036        | 19          | 0.706         | 0.480                         | 0.051        | 24        | 0.271         | 0.787         |       |              |
| 14   | 15  | T                       | G    | 0.581        | 52          | 0.949        | 0.343                       | 0.703        | 0.725        | 72            | -2.669        | <b>0.0076</b>             | <b>0.011</b>    | 0.541        | 0.466         | -1.419         | 0.156                       | 0.083           | 0.569        | 0.500        | -1.752        | 0.080                  | 0.132         | 0.614        | 72          | 0.291         | 0.771                         | 0.258        | 0.887     | 35            | 0.268         | 0.789 | 0.421        |
| 14   | 15  | C                       | G    | 0.063        | 20          | -0.344       | 0.731                       | 0.121        | 45           | 2.484         | <b>0.013</b>  |                           | 0.182           | 0.164        | -0.595        | 0.552          |                             |                 | 0.082        | 0.118        | 1.502         | 0.133                  |               | 0.065        | 18          | 1.852         | 0.064                         | 0.054        | 22        | 1.072         | 0.284         |       |              |
| 15   | 16  | G                       | T    | 0.041        | 24          | -0.353       | 0.724                       | 0.793        | 0.040        | 18            | 0.118         | 0.906                     | 0.861           | 0.044        | 0.055         | 0.538          | 0.591                       | 0.115           | 0.063        | 0.008        | -3.621        | <b>0.00029</b>         | <b>0.0031</b> | 0.047        | 22          | 0.628         | 0.530                         | 0.253        | 0.002     | 1             | *             | *     | 0.730        |
| 15   | 16  | G                       | A    | 0.611        | 57          | 0.830        | 0.407                       | 0.813        | 78           | 0.617         | 0.538         |                           | 0.680           | 0.579        | -2.064        | <b>0.039</b>   |                             |                 | 0.586        | 0.609        | 0.652         | 0.653                  |               | 0.644        | 69          | 0.866         | 0.386                         | 0.947        | 18        | 0.698         | 0.485         |       |              |
| 15   | 16  | T                       | T    | 0.018        | 2           | *            | *                           | 0.003        | 4            | *             | *             |                           | *               | *            | *             | *              |                             |                 | 0.011        | 0.016        | -0.291        | 0.771                  |               | 0.015        | 10          | 1.330         | 0.183                         | 0.004        | 2         | *             | *             |       |              |
| 16   | 17  | A                       | T    | <b>0.265</b> | <b>52</b>   |              |                             |              |              |               |               |                           |                 |              |               |                |                             |                 |              |              |               |                        |               |              |             |               |                               |              |           |               |               |       |              |

Supplemental Table 6

| SNP# | SNP | HAP | Discovery Datasets      |      |         |         |              |                             |      |         |                |              | Replication Datasets      |                 |               |               |               |                             |                 |               |                |                |                        |              |               |               |              |                               |           |               |              |              |       |       |        |       |   |       |
|------|-----|-----|-------------------------|------|---------|---------|--------------|-----------------------------|------|---------|----------------|--------------|---------------------------|-----------------|---------------|---------------|---------------|-----------------------------|-----------------|---------------|----------------|----------------|------------------------|--------------|---------------|---------------|--------------|-------------------------------|-----------|---------------|--------------|--------------|-------|-------|--------|-------|---|-------|
|      |     |     | North European Families |      |         |         |              | Caribbean Hispanic Families |      |         |                |              | Israeli Arab case-control |                 |               |               |               | North European case-control |                 |               |                |                | MIRAGE Caucasians Sibs |              |               |               |              | MIRAGE African-Americans Sibs |           |               |              |              |       |       |        |       |   |       |
|      |     |     | Hap frequency           | Info | Z Score | p-value | Global sim p | Hap frequency               | Info | Z Score | Hap p-value    | Global sim p | Control frequency         | Cases frequency | Z Score       | Hap p-value   | Global sim p  | Control frequency           | Cases frequency | Z Score       | Hap p-value    | Global sim p   | Hap frequency          | Info         | Z Score       | p-value       | Global sim p | Hap frequency                 | Info      | Z Score       | p-value      | Global sim p |       |       |        |       |   |       |
| 1    | 2   | 3   | 4                       | A    | C       | A       | T            | 0.256                       | 44   | -3.332  | <b>0.00086</b> | <b>0.014</b> | 0.154                     | 44              | -1.039        | 0.299         | 0.850         | 0.230                       | 0.219           | -0.011        | 0.991          | <b>0.018</b>   | ND                     | ND           | ND            | ND            | ND           | 0.269                         | 52        | 1.521         | 0.128        | 0.327        | 0.041 | 10    | -      | -     | - | 0.541 |
| 1    | 2   | 3   | 4                       | G    | G       | A       | T            | 0.098                       | 19   | 2.664   | <b>0.0077</b>  | -            | 0.171                     | 48              | 1.080         | 0.289         | -             | 0.115                       | 0.115           | -0.220        | 0.826          | -              | ND                     | ND           | ND            | ND            | ND           | 0.094                         | 33        | -0.552        | 0.581        | -            | 0.195 | 22    | 1.213  | 0.225 | - |       |
| 1    | 2   | 3   | 4                       | G    | A       | C       | T            | 0.044                       | 14   | 1.195   | <b>0.232</b>   | -            | 0.092                     | 29              | -0.708        | 0.479         | -             | 0.079                       | 0.016           | -3.022        | <b>0.0024</b>  | -              | ND                     | ND           | ND            | ND            | ND           | 0.066                         | 26        | 0.368         | 0.364        | -            | 0.012 | 7     | -      | -     | - | -     |
| 1    | 2   | 3   | 4                       | A    | G       | G       | T            | 0.015                       | 4    | -       | -              | -            | 0.133                     | 8               | -             | -             | -             | 0.043                       | 0.096           | 2.102         | <b>0.036</b>   | -              | ND                     | ND           | ND            | ND            | ND           | 0.011                         | 4         | -             | -            | -            | 0.097 | 19    | -1.292 | 0.196 | - |       |
| 1    | 2   | 3   | 4                       | A    | G       | A       | T            | 0.154                       | 28   | 0.282   | 0.793          | -            | 0.157                     | 49              | -0.722        | 0.470         | -             | 0.149                       | 0.240           | 2.841         | <b>0.0045</b>  | -              | ND                     | ND           | ND            | ND            | ND           | 0.175                         | 36        | -0.750        | 0.453        | -            | 0.184 | 22    | -1.601 | 0.109 | - |       |
| 2    | 3   | 4   | 5                       | C    | A       | C       | T            | 0.162                       | 32   | 1.065   | 0.287          | 0.458        | 0.104                     | 39              | 0.833         | 0.351         | 0.892         | 0.132                       | 0.085           | -0.267        | <b>0.039</b>   | <b>0.044</b>   | 0.111                  | 0.124        | -0.682        | 0.495         | 0.145        | 0.164                         | 45        | 0.627         | 0.531        | 0.067        | 0.015 | 4     | -      | -     | - | 0.851 |
| 2    | 3   | 4   | 5                       | G    | A       | T       | C            | 0.164                       | 33   | -2.259  | <b>0.024</b>   | -            | 0.098                     | 44              | 0.391         | 0.696         | -             | <b>0.086</b>                | <b>0.221</b>    | <b>3.283</b>  | <b>0.0010</b>  | -              | <b>0.134</b>           | <b>0.222</b> | <b>2.324</b>  | <b>0.020</b>  | -            | 0.142                         | 32        | 0.834         | 0.404        | -            | 0.057 | 19    | -0.050 | 0.960 | - |       |
| 2    | 3   | 4   | 5                       | G    | A       | T       | T            | 0.149                       | 30   | 2.015   | <b>0.044</b>   | -            | 0.237                     | 59              | -0.755        | 0.450         | -             | 0.176                       | 0.123           | -0.327        | 0.743          | -              | 0.157                  | 0.131        | -0.192        | 0.847         | -            | 0.131                         | 32        | -0.565        | 0.572        | -            | 0.296 | 36    | -0.056 | 0.955 | - |       |
| 2    | 3   | 4   | 5                       | C    | A       | T       | T            | 0.085                       | 18   | -0.816  | 0.414          | -            | 0.083                     | 29              | -0.759        | 0.445         | -             | 0.096                       | 0.140           | -0.175        | 0.861          | -              | 0.082                  | 0.088        | 1.010         | 0.313         | -            | 0.096                         | 26        | 2.084         | <b>0.037</b> | -            | 0.021 | 7     | -      | -     | - | -     |
| 5    | 6   | 7   | 8                       | T    | A       | T       | A            | 0.068                       | 12   | -0.915  | 0.360          | 0.289        | 0.130                     | 41              | 1.188         | 0.235         | 0.444         | 0.089                       | 0.042           | -2.011        | <b>0.044</b>   | <b>0.019</b>   | 0.067                  | 0.048        | -1.092        | 0.275         | 0.627        | 0.038                         | 9         | -             | -            | -            | 0.624 | 0.026 | 1      | -     | - | 0.675 |
| 5    | 6   | 7   | 8                       | T    | A       | T       | A            | 0.321                       | 49   | 1.241   | 0.215          | -            | 0.271                     | 74              | -1.010        | 0.313         | -             | 0.336                       | 0.264           | -1.949        | 0.051          | -              | 0.339                  | 0.289        | -1.591        | 0.112         | -            | 0.302                         | 51        | 1.579         | 0.114        | -            | 0.156 | 38    | 0.953  | 0.341 | - |       |
| 5    | 6   | 7   | 8                       | C    | T       | G       | C            | 0.373                       | 54   | -0.791  | 0.429          | -            | 0.195                     | 54              | 0.171         | 0.864         | -             | 0.233                       | 0.364           | 2.899         | <b>0.0037</b>  | -              | 0.341                  | 0.412        | 1.910         | 0.056         | -            | 0.274                         | 49        | -1.253        | 0.210        | -            | 0.134 | 25    | -0.892 | 0.372 | - |       |
| 6    | 7   | 8   | 9                       | T    | G       | C       | G            | 0.527                       | 51   | -1.776  | 0.076          | 0.278        | 0.515                     | 77              | 1.639         | 0.101         | <b>0.045</b>  | <b>0.494</b>                | <b>0.669</b>    | <b>2.734</b>  | <b>0.018</b>   | <b>0.045</b>   | <b>0.510</b>           | <b>0.589</b> | <b>2.132</b>  | <b>0.033</b>  | 0.120        | <b>0.313</b>                  | <b>44</b> | <b>-2.004</b> | <b>0.045</b> | 0.168        | 0.320 | 42    | -0.260 | 0.795 | - | 0.861 |
| 6    | 7   | 8   | 9                       | A    | T       | A       | T            | 0.329                       | 49   | 1.236   | 0.216          | -            | 0.290                     | 78              | -1.780        | 0.075         | -             | 0.358                       | 0.268           | -2.135        | <b>0.033</b>   | -              | 0.361                  | 0.307        | -1.621        | 0.105         | -            | 0.146                         | 30        | 0.609         | 0.542        | -            | 0.083 | 21    | 0.024  | 0.981 | - |       |
| 6    | 7   | 8   | 9                       | T    | G       | C       | A            | 0.010                       | 0    | -       | -              | -            | 0.006                     | 1               | -             | -             | -             | 0.001                       | 0               | -             | -              | -              | 0.010                  | 0            | -             | -             | -            | 0.126                         | 24        | -0.956        | 0.336        | -            | 0.215 | 25    | -0.526 | 0.531 | - |       |
| 6    | 7   | 8   | 9                       | A    | T       | G       | C            | 0.001                       | 0    | -       | -              | -            | 0.004                     | 0               | -             | -             | -             | 0.004                       | 0               | -             | -              | -              | 0.001                  | 0            | -             | -             | -            | 0.183                         | 23        | 2.464         | <b>0.014</b> | -            | 0.103 | 19    | 0.348  | 0.727 | - |       |
| 6    | 7   | 8   | 9                       | T    | G       | A       | T            | 0.064                       | 11   | 0.181   | 0.856          | -            | 0.037                     | 10              | -1.040        | 0.298         | -             | 0.084                       | 0.039           | -2.008        | <b>0.045</b>   | -              | 0.059                  | 0.048        | -0.670        | 0.503         | -            | 0.014                         | 4         | -             | -            | -            | 0.017 | 0     | -      | -     | - | -     |
| 7    | 8   | 9   | 10                      | G    | A       | T       | A            | 0.528                       | 51   | -1.561  | 0.119          | 0.187        | 0.516                     | 74              | 1.409         | 0.159         | <b>0.025</b>  | <b>0.434</b>                | <b>0.629</b>    | <b>2.385</b>  | <b>0.017</b>   | 0.053          | <b>0.513</b>           | <b>0.599</b> | <b>2.289</b>  | <b>0.022</b>  | 0.091        | 0.303                         | 46        | -1.694        | 0.090        | 0.230        | 0.320 | 42    | -0.660 | 0.509 | - | 0.853 |
| 7    | 8   | 9   | 10                      | A    | T       | A       | T            | 0.390                       | 53   | 1.136   | 0.256          | -            | <b>0.317</b>              | <b>73</b>       | <b>-2.594</b> | <b>0.0095</b> | -             | <b>0.434</b>                | <b>0.297</b>    | <b>-2.991</b> | <b>0.0028</b>  | -              | <b>0.417</b>           | <b>0.351</b> | <b>-1.825</b> | <b>0.068</b>  | -            | 0.171                         | 35        | 0.820         | 0.412        | -            | 0.073 | 20    | 0.156  | 0.776 | - |       |
| 7    | 8   | 9   | 10                      | A    | C       | G       | C            | 0.053                       | 14   | 1.046   | 0.295          | -            | 0.126                     | 33              | 1.832         | 0.053         | -             | 0.046                       | 0.062           | 0.298         | 0.766          | -              | 0.053                  | 0.039        | -0.702        | 0.483         | -            | 0.105                         | 18        | 0.519         | 0.603        | -            | 0.158 | 29    | 0.257  | 0.798 | - |       |
| 7    | 8   | 9   | 10                      | G    | A       | C       | G            | 0.010                       | 1    | -       | -              | -            | 0.006                     | 2               | -             | -             | -             | 0.002                       | 0               | -             | -              | -              | 0.010                  | 0            | -             | -             | -            | 0.128                         | 24        | -0.699        | 0.510        | -            | 0.227 | 24    | -0.061 | 0.952 | - |       |
| 7    | 8   | 9   | 10                      | T    | G       | A       | T            | 0.001                       | 0    | -       | -              | -            | 0.001                     | 0               | -             | -             | -             | 0.009                       | 0.014           | 0.394         | 0.693          | -              | 0.001                  | 0            | -             | -             | -            | 0.081                         | 18        | -1.056        | 0.845        | -            |       |       |        |       |   |       |
| 8    | 9   | 10  | 11                      | C    | C       | C       | C            | 0.410                       | 54   | -1.041  | 0.298          | 0.640        | 0.218                     | 48              | -1.155        | 0.248         | <b>0.0068</b> | <b>0.282</b>                | <b>0.406</b>    | <b>2.859</b>  | <b>0.0043</b>  | <b>0.011</b>   | <b>0.385</b>           | <b>0.454</b> | <b>1.957</b>  | <b>0.050</b>  | 0.392        | 0.282                         | 43        | -1.092        | 0.275        | 0.268        | 0.089 | 20    | 0.026  | 0.979 | - | 0.748 |
| 8    | 9   | 10  | 11                      | T    | A       | T       | A            | 0.379                       | 54   | 0.858   | 0.391          | -            | <b>0.306</b>              | <b>66</b>       | <b>-2.223</b> | <b>0.026</b>  | -             | <b>0.405</b>                | <b>0.247</b>    | <b>-3.377</b> | <b>0.00073</b> | -              | <b>0.392</b>           | <b>0.324</b> | <b>-1.887</b> | <b>0.059</b>  | -            | 0.218                         | 35        | -0.800        | 0.423        | -            | 0.064 | 19    | 0.151  | 0.880 | - |       |
| 8    | 9   | 10  | 11                      | T    | G       | C       | A            | 0.172                       | 40   | 0.164   | 0.870          | -            | 0.428                     | 64              | 3.160         | <b>0.0016</b> | -             | <b>0.267</b>                | <b>0.255</b>    | <b>-0.215</b> | <b>0.830</b>   | -              | 0.181                  | 0.184        | 0.186         | 0.852         | -            | 0.125                         | 23        | -0.162        | 0.871        | -            | 0.403 | 46    | -0.645 | 0.519 | - |       |
| 8    | 9   | 10  | 11                      | T    | G       | A       | T            | 0.001                       | 0    | -       | -              | -            | 0.001                     | 0               | -             | -             | -             | 0.009                       | 0.014           | 0.406         | 0.684          | -              | 0.001                  | 0            | -             | -             | -            | 0.205                         | 19        | 2.463         | <b>0.014</b> | -            | 0.070 | 17    | 0.273  | 0.784 | - |       |
| 9    | 10  | 11  | 12                      | C    | C       | C       | C            | 0.409                       | 57   | -1.300  | 0.194          | 0.240        | 0.213                     | 51              | -1.818        | 0.069         | <b>0.012</b>  | <b>0.292</b>                | <b>0.407</b>    | <b>-2.828</b> | <b>0.0047</b>  | <b>0.0080</b>  | <b>0.479</b>           | <b>0.455</b> | <b>-2.443</b> | <b>0.032</b>  | 0.241        | 0.263                         | 49        | -1.118        | 0.264        | 0.591        | 0.066 | 17    | 0.484  | 0.628 | - | 0.853 |
| 9    | 10  | 11  | 12                      | A    | T       | A       | T            | 0.375                       | 54   | 0.795   | 0.425          | -            | <b>0.315</b>              | <b>68</b>       | <b>-1.978</b> | <b>0.049</b>  | -             | 0.416                       | 0.247           | -3.380        | <b>0.00070</b> | -              | 0.394                  | 0.324        | -1.996        | 0.057         | -            | 0.221                         | 42        | -0.464        | 0.643        | -            | 0.104 | 19    | 0.157  | 0.875 | - |       |
| 9    | 10  | 11  | 12                      | C    | A       | C       | C            | 0.130                       | 28   | -0.772  | 0.440          | -            | 0.350                     | 55              | 2.347         | <b>0.019</b>  | -             | 0.256                       | 0.251           | -2.528        | 0.796          | -              | 0.140                  | 0.151        | 0.480         | 0.631         | -            | 0.100                         | 17        | 1.234         | 0.217        | -            | 0.345 | 45    | -0.049 | 0.961 | - |       |
| 9    | 10  | 11  | 12                      | G    | C       | A       | T            | 0.044                       | 13   | 2.033   | <b>0.042</b>   | -            | 0.081                     | 30              | 1.377         | 0.168         | -             | 0.049                       | 0.040           | -0.574        | 0.566          | -              | 0.049                  | 0.040        | -0.574        | 0.566         | -            | 0.032                         | 12        | -0.823        | 0.410        | -            | 0.056 | 9     | -      | -     | - | -     |
| 10   | 11  | 12  | 13                      | T    | A       | C       | G            | 0.396                       | 56   | 0.907   | 0.364          | 0.127        | 0.348                     | 77              | -1.468        | 0.124         | 0.085         | <b>0.418</b>                | <b>0.265</b>    | <b>-3.187</b> | <b>0.0014</b>  | <b>0.0037</b>  | <b>0.396</b>           | <b>0.323</b> | <b>-1.863</b> | <b>0.050</b>  | 0.325        | 0.442                         | 72        | -0.632        | 0.527        | 0.385        | 0.229 | 39    | 0.669  | 0.504 | - | 0.976 |
| 10   | 11  | 12  | 13                      | C    | C       | C       | G            | 0.395                       | 58   | -1.391  | 0.164          | -            | 0.211                     | 58              | -1.112        | 0.286         | -             | <b>0.281</b>                | <b>0.423</b>    | <b>3.067</b>  | <b>0.0022</b>  | -              | <b>0.388</b>           | <b>0.458</b> | <b>1.967</b>  | <b>0.049</b>  | -            | 0.330                         | 70        | -0.803        | 0.422        | -            | 0.124 | 27    | -0.488 | 0.625 | - |       |
| 10   | 11  | 12  | 13                      | C    | A       | T       | A            | 0.035                       | 13   | 2.034   | <b>0.042</b>   | -            | 0.052                     | 30              | 0.192         | 0.848         | -             | 0.049                       | 0.040           | -0.624        | 0.533          | -              | 0.049                  | 0.040        | -0.624        | 0.533         | -            | 0.032                         | 18        | 0.919         | 0.358        | -            | 0.034 | 17    | 0.337  | 0.736 | - |       |
| 10   | 11  | 12  | 13                      | C    | A       | C       | G            | 0.149                       | 30   | -0.897  | 0.370          | -            | 0.356                     | 63              | 2.264         | <b>0.024</b>  | -             | 0.271                       | 0.262           | -2.078        | 0.789          | -              | 0.144                  | 0.152        | 0.391         | 0.695         | -            | 0.163                         | 42        | 1.578         | 0.115        | -            | 0.589 | 52    | -0.358 | 0.720 | - |       |
| 11   | 12  | 13  | 14                      | A    | G       | T       | A            | 0.488                       | 52   | 1.396   | 0.163          | 0.063        | <b>0.599</b>              | <b>64</b>       | <b>-2.619</b> | <b>0.0008</b> | <b>0.0078</b> | <b>0.258</b>                | <b>0.336</b>    | <b>-3.265</b> | <b>0.0021</b>  | <b>0.00025</b> | <b>0.486</b>           | <b>0.365</b> | <b>-2.751</b> | <b>0.0059</b> | <b>0.039</b> | 0.531                         | 69        | -0.252        | 0.801        | 0.428        | 0.739 | 40    | -0.238 | 0.812 | - | 0.800 |
| 11   | 12  | 13  | 14                      | C    | C       | G       | T            | 0.413                       | 57   | -0.996  | 0.319          | -            | <b>0.204</b>              | <b>51</b>       | <b>2.072</b>  | <b>0.038</b>  | -             | <b>0.251</b>                | <b>0.452</b>    | <b>3.684</b>  | <b>0.00023</b> | -              | <b>0.382</b>           | <b>0.477</b> | <b>2.175</b>  | <b>0.030</b>  | -            | 0.380                         | 64        | -0.818        | 0.413        | -            | 0.135 | 28    | -0.443 | 0.658 | - |       |
|      |     |     |                         |      |         |         |              |                             |      |         |                |              |                           |                 |               |               |               |                             |                 |               |                |                |                        |              |               |               |              |                               |           |               |              |              |       |       |        |       |   |       |

Supplemental Table 7

| SNP# | SNP | Discovery Datasets      |      |    |         |        |                             |      |   |         |        | Replication Datasets      |       |       |         |        |                             |       |       |         |        |                        |        |       |         |        |                               |        |        |         |        |        |        |        |        |       |        |       |       |       |
|------|-----|-------------------------|------|----|---------|--------|-----------------------------|------|---|---------|--------|---------------------------|-------|-------|---------|--------|-----------------------------|-------|-------|---------|--------|------------------------|--------|-------|---------|--------|-------------------------------|--------|--------|---------|--------|--------|--------|--------|--------|-------|--------|-------|-------|-------|
|      |     | North European Families |      |    |         |        | Caribbean Hispanic Families |      |   |         |        | Israeli Arab case-control |       |       |         |        | North European case-control |       |       |         |        | MIRAGE Caucasians Sibs |        |       |         |        | MIRAGE African-Americans Sibs |        |        |         |        |        |        |        |        |       |        |       |       |       |
|      |     | Hap                     | Info | Z  | p-value | Global | Hap                         | Info | Z | p-value | Global | Control                   | Cases | Z     | p-value | Global | Control                     | Cases | Z     | p-value | Global | Hap                    | Info   | Z     | p-value | Global | Hap                           | Info   | Z      | p-value | Global |        |        |        |        |       |        |       |       |       |
| 1    | 2   | 3                       | 4    | 5  | G       | A      | C                           | A    | C | 0.098   | 10     | 1.210                     | 0.312 | 0.101 | 0.107   | 33     | 1.366                       | 0.172 | 0.058 | 0.014   | -2.752 | 0.0059                 | 0.0060 | ND    | ND      | ND     | ND                            | ND     | 0.085  | 19      | 0.844  | 0.520  | 0.303  | 0.010  | 5      | -     | -      | -     | 0.295 |       |
| 1    | 2   | 3                       | 4    | 5  | A       | C      | A                           | C    | T | 0.159   | 29     | 1.224                     | 0.221 | -     | 0.107   | 33     | 1.366                       | 0.172 | 0.122 | 0.079   | -2.001 | 0.045                  | ND     | ND    | ND      | ND     | ND                            | 0.173  | 35     | -0.139  | 0.890  | 0.007  | 1      | -      | -      | -     | -      |       |       |       |
| 1    | 2   | 3                       | 4    | 5  | G       | A      | C                           | A    | C | 0.081   | 16     | -1.665                    | 0.096 | -     | 0.077   | 158    | 3.215                       | 0.976 | 0.077 | 0.158   | 3.215  | 0.0013                 | ND     | ND    | ND      | ND     | ND                            | 0.102  | 14     | -0.645  | 0.519  | 0.037  | 9      | -      | -      | -     | -      |       |       |       |
| 1    | 2   | 3                       | 4    | 5  | G       | A      | C                           | A    | T | 0.070   | 14     | 3.012                     | 0.003 | -     | 0.103   | 0.046  | -1.544                      | 0.123 | 0.103 | 0.046   | -1.544 | 0.123                  | ND     | ND    | ND      | ND     | ND                            | 0.035  | 10     | -       | -      | -      | -      | 0.178  | 11     | 0.093 | 0.926  | -     | -     |       |
| 1    | 2   | 3                       | 4    | 5  | A       | C      | A                           | C    | T | 0.173   | 31     | -2.235                    | 0.025 | -     | 0.060   | 14     | -0.562                      | 0.574 | 0.129 | 0.095   | 0.143  | 0.886                  | ND     | ND    | ND      | ND     | ND                            | 0.157  | 30     | 0.598   | 0.550  | 0.010  | 2      | -      | -      | -     | -      |       |       |       |
| 1    | 2   | 3                       | 4    | 5  | G       | A      | C                           | T    | A | 0.027   | 8      | -2.308                    | 0.019 | -     | 0.137   | 19     | 1.269                       | 0.174 | 0.027 | 0.014   | -2.308 | 0.019                  | ND     | ND    | ND      | ND     | ND                            | 0.048  | 14     | 0.174   | 0.747  | 0.015  | 3      | -      | -      | -     | -      |       |       |       |
| 2    | 3   | 4                       | 5    | 6  | A       | C      | A                           | T    | C | 0.130   | 27     | 2.130                     | 0.033 | 0.242 | 0.050   | 29     | 0.693                       | 0.488 | 0.238 | 0.141   | 0.071  | -2.367                 | 0.018  | 0.017 | ND      | ND     | ND                            | ND     | ND     | 0.138   | 30     | -0.041 | 0.967  | 0.318  | 0.008  | 3     | -      | -     | -     | 0.567 |
| 2    | 3   | 4                       | 5    | 6  | G       | O      | C                           | T    | T | 0.006   | 2      | -                         | -     | -     | 0.034   | 9      | -                           | -     | 0.034 | 9       | -      | -                      | ND     | ND    | ND      | ND     | ND                            | 0.070  | 5      | -       | -      | -      | -      | 0.070  | 5      | -     | -      | -     |       |       |
| 2    | 3   | 4                       | 5    | 6  | G       | A      | C                           | T    | T | 0.108   | 15     | 0.034                     | 0.831 | -     | 0.074   | 31     | -0.214                      | 0.831 | 0.091 | 0.194   | 0.000  | 0.902                  | ND     | ND    | ND      | ND     | ND                            | 0.148  | 21     | -0.073  | 0.942  | 0.063  | 15     | -0.356 | 0.722  | -     | -      |       |       |       |
| 2    | 3   | 4                       | 5    | 6  | A       | C      | A                           | C    | T | 0.157   | 28     | -1.982                    | 0.073 | -     | 0.092   | 119    | 0.828                       | 0.408 | 0.092 | 0.109   | 0.594  | 0.552                  | ND     | ND    | ND      | ND     | ND                            | 0.127  | 23     | -0.638  | 0.524  | 0.013  | 4      | -      | -      | -     | -      |       |       |       |
| 2    | 3   | 4                       | 5    | 6  | G       | A      | C                           | T    | A | 0.052   | 14     | 0.018                     | 0.44  | -     | 0.052   | 16     | -2.189                      | 0.029 | 0.021 | 0.029   | 0.060  | 0.962                  | ND     | ND    | ND      | ND     | ND                            | 0.018  | 8      | -       | -      | -      | -      | 0.066  | 17     | 0.734 | 0.463  | -     | -     |       |
| 2    | 3   | 4                       | 5    | 6  | A       | C      | A                           | T    | T | 0.079   | 18     | -1.292                    | 0.196 | -     | 0.082   | 28     | -1.030                      | 0.303 | 0.083 | 0.105   | -0.143 | 0.886                  | ND     | ND    | ND      | ND     | ND                            | 0.091  | 18     | 2.670   | 0.0076 | 0.018  | 4      | -      | -      | -     | -      |       |       |       |
| 2    | 3   | 4                       | 5    | 6  | A       | T      | C                           | T    | C | 0.267   | 38     | -1.451                    | 0.147 | 0.689 | 0.155   | 42     | 0.370                       | 0.711 | 0.647 | 0.160   | 0.279  | 2.811                  | 0.0049 | 0.371 | 0.282   | 0.380  | 2.680                         | 0.0074 | 0.046  | 0.248   | 33     | -1.063 | 0.288  | 0.351  | 0.083  | 12    | -0.781 | 0.435 | 0.872 | -     |
| 3    | 4   | 5                       | 6    | 7  | A       | C      | T                           | A    | T | 0.263   | 44     | 1.507                     | 0.132 | -     | 0.200   | 51     | -0.407                      | 0.684 | 0.250 | 0.154   | -2.658 | 0.0079                 | 0.260  | 0.225 | -1.074  | 0.283  | 0.259                         | 40     | 1.028  | 0.304   | 0.047  | 11     | 0.156  | 0.876  | -      | -     |        |       |       |       |
| 3    | 4   | 5                       | 6    | 7  | G       | T      | C                           | T    | G | 0.032   | 10     | -                         | -     | -     | 0.032   | 6      | -                           | -     | 0.032 | 6       | -      | -                      | 0.013  | 55    | -1.436  | 0.157  | 0.011                         | 2      | -      | -       | -      | -      | 0.041  | 10     | 0.342  | 0.733 | -      | -     |       |       |
| 5    | 6   | 7                       | 8    | 9  | A       | T      | A                           | T    | A | 0.312   | 34     | 0.425                     | 0.695 | -     | 0.255   | 52     | -1.050                      | 0.294 | 0.337 | 0.253   | 2.014  | 0.044                  | 0.017  | 0.339 | 0.395   | -1.670 | 0.095                         | 0.525  | 0.127  | 14      | -0.058 | 0.954  | 0.366  | 0.069  | 9      | -     | -      | -     | 0.979 |       |
| 5    | 6   | 7                       | 8    | 9  | T       | T      | A                           | T    | A | 0.073   | 10     | 0.000                     | 1.000 | -     | 0.034   | 8      | -                           | -     | 0.084 | 0.039   | -2.008 | 0.045                  | 0.058  | 0.048 | -0.651  | 0.515  | 0.015                         | 3      | -      | -       | -      | -      | 0.013  | 0      | -      | -     | -      |       |       |       |
| 5    | 6   | 7                       | 8    | 9  | C       | T      | G                           | C    | G | 0.363   | 38     | -0.556                    | 0.578 | -     | 0.199   | 38     | -0.527                      | 0.598 | 0.233 | 0.350   | 2.687  | 0.0072                 | 0.336  | 0.413 | 2.069   | 0.039  | 0.203                         | 18     | -1.395 | 0.163   | 0.073  | 13     | 0.184  | 0.870  | -      | -     |        |       |       |       |
| 5    | 6   | 7                       | 8    | 9  | T       | T      | A                           | C    | G | 0.054   | 14     | 1.427                     | 0.153 | -     | 0.129   | 30     | 2.034                       | 0.042 | 0.031 | 0.011   | -0.801 | 0.423                  | 0.048  | 0.032 | -0.918  | 0.359  | 0.069                         | 4      | -      | -       | -      | -      | 0.163  | 20     | -0.291 | 0.771 | -      | -     |       |       |
| 5    | 6   | 7                       | 8    | 9  | T       | T      | A                           | C    | G | 0.032   | 0      | -                         | -     | -     | 0.006   | 0      | -                           | -     | 0.006 | 0       | -      | -                      | 0.360  | 0.308 | -1.592  | 0.111  | 0.148                         | 0.177  | 11     | 2.497   | 0.013  | 0.017  | 13     | 0.339  | 0.735  | -     | -      |       |       |       |
| 6    | 7   | 8                       | 9    | 10 | A       | T      | A                           | T    | A | 0.299   | 53     | 0.662                     | 0.598 | 0.450 | 0.269   | 53     | -1.582                      | 0.114 | 0.289 | 0.258   | -2.157 | 0.031                  | 0.037  | 0.360 | 0.308   | -1.592 | 0.111                         | 0.148  | 0.177  | 11      | 2.497  | 0.013  | 0.017  | 13     | 0.339  | 0.735 | -      | -     |       |       |
| 6    | 7   | 8                       | 9    | 10 | T       | T      | A                           | T    | A | 0.075   | 10     | -                         | -     | -     | 0.039   | 9      | -                           | -     | 0.085 | 0.038   | -2.058 | 0.040                  | 0.057  | 0.046 | -0.721  | 0.471  | 0.010                         | 1      | -      | -       | -      | -      | 0.005  | 0      | -      | -     | -      |       |       |       |
| 6    | 7   | 8                       | 9    | 10 | C       | T      | G                           | C    | G | 0.524   | 26     | -1.482                    | 0.138 | -     | 0.515   | 34     | 0.507                       | 0.612 | 0.494 | 0.610   | 2.388  | 0.017                  | 0.511  | 0.591 | 2.178   | 0.029  | 0.297                         | 23     | -1.141 | 0.254   | 0.329  | 25     | 0.310  | 0.757  | -      | -     |        |       |       |       |
| 6    | 7   | 8                       | 9    | 10 | A       | T      | A                           | C    | G | 0.064   | 13     | 1.236                     | 0.216 | -     | 0.138   | 24     | 2.015                       | 0.044 | 0.048 | 0.052   | 0.298  | 0.766                  | 0.053  | 0.039 | -0.755  | 0.450  | 0.063                         | 11     | 2.491  | 0.013   | 0.018  | 11     | -0.460 | 0.645  | -      | -     |        |       |       |       |
| 6    | 7   | 8                       | 9    | 10 | A       | T      | A                           | C    | G | 0.052   | 0      | -                         | -     | -     | 0.004   | 0      | -                           | -     | 0.004 | 0       | -      | -                      | 0.378  | 0.456 | -2.169  | 0.030  | 0.286                         | 0.215  | 21     | -2.106  | 0.035  | 0.147  | 0.061  | 18     | 0.263  | 0.716 | -      | -     |       |       |
| 7    | 8   | 9                       | 10   | 11 | C       | T      | G                           | C    | G | 0.196   | 37     | -1.611                    | 0.107 | 0.043 | 0.406   | 36     | -1.195                      | 0.232 | 0.369 | 0.076   | 2.684  | 0.0027                 | 0.036  | 0.078 | 0.456   | -2.169 | 0.030                         | 0.286  | 0.215  | 21      | -2.106 | 0.035  | 0.147  | 0.061  | 18     | 0.263 | 0.716  | -     | -     |       |
| 7    | 8   | 9                       | 10   | 11 | A       | C      | G                           | T    | A | 0.126   | 26     | 2.152                     | 0.031 | -     | 0.064   | 14     | 1.431                       | 0.152 | 0.023 | 0.022   | -0.107 | 0.915                  | 0.052  | 0.038 | -0.763  | 0.434  | 0.064                         | 7      | -      | -       | -      | -      | 0.155  | 22     | -0.131 | 0.896 | -      | -     |       |       |
| 7    | 8   | 9                       | 10   | 11 | A       | T      | G                           | T    | A | -       | -      | -                         | -     | -     | 0.009   | 0.014  | 0.407                       | 0.684 | 0.009 | 0.014   | 0.407  | 0.684                  | -      | -     | -       | -      | -                             | -      | -      | -       | 0.233  | 13     | 2.134  | 0.033  | 0.078  | 12    | -0.115 | 0.908 | -     | -     |
| 7    | 8   | 9                       | 10   | 11 | A       | T      | A                           | T    | A | 0.371   | 34     | 0.709                     | 0.479 | -     | 0.314   | 51     | -1.916                      | 0.055 | 0.405 | 0.243   | -3.468 | 0.00052                | 0.334  | 0.325 | -1.887  | 0.059  | 0.164                         | 13     | 0.672  | 0.501   | 0.068  | 12     | -0.241 | 0.810  | -      | -     |        |       |       |       |
| 7    | 8   | 9                       | 10   | 11 | C       | G      | A                           | T    | A | 0.041   | 13     | 2.033                     | 0.042 | 0.263 | 0.078   | 21     | 1.851                       | 0.064 | 0.078 | 0.255   | -1.851 | 0.064                  | 0.078  | 0.049 | 0.040   | -0.625 | 0.532                         | 0.412  | 0.032  | 8       | -      | -      | -      | -      | 0.068  | 9     | -      | -     | 0.909 |       |
| 8    | 9   | 10                      | 11   | 12 | C       | G      | A                           | T    | A | 0.292   | 54     | 0.797                     | 0.425 | -     | 0.257   | 62     | -0.215                      | 0.830 | 0.416 | 0.247   | -3.290 | 0.0007                 | 0.354  | 0.252 | -1.905  | 0.056  | 0.087                         | 14     | 1.201  | 0.230   | 0.335  | 33     | -      | -      | -      | -     | 0.682  | 0.485 |       |       |
| 8    | 9   | 10                      | 11   | 12 | T       | A      | T                           | A    | C | 0.386   | 49     | 0.778                     | 0.436 | -     | 0.405   | 67     | -2.295                      | 0.022 | 0.405 | 0.247   | -3.377 | 0.00073                | 0.394  | 0.325 | -1.890  | 0.059  | 0.222                         | 28     | -1.084 | 0.278   | 0.063  | 14     | -0.108 | 0.914  | -      | -     |        |       |       |       |
| 8    | 9   | 10                      | 11   | 12 | T       | G      | T                           | A    | C | -       | -      | -                         | -     | -     | 0.009   | 0.014  | 0.406                       | 0.684 | 0.009 | 0.014   | 0.406  | 0.684                  | -      | -     | -       | -      | -                             | -      | -      | -       | 0.222  | 16     | 2.262  | 0.024  | 0.076  | 14    | 0.318  | 0.750 | -     | -     |
| 8    | 9   | 10                      | 11   | 12 | C       | G      | C                           | C    | G | 0.410   | 51     | -1.220                    | 0.223 | -     | 0.214   | 41     | -1.071                      | 0.284 | 0.282 | 0.406   | 2.859  | 0.0043                 | 0.379  | 0.455 | -2.128  | 0.033  | 0.281                         | 33     | -1.200 | 0.230   | 0.074  | 11     | 0.622  | 0.508  | -      | -     |        |       |       |       |
| 8    | 9   | 10                      | 11   | 12 | G       | C      | C                           | G    | C | 0.417   | 56     | -1.257                    | 0.209 | 0.166 | 0.223   | 45     | -1.606                      | 0.108 | 0.282 | 0.407   | 2.838  | 0.0047                 | 0.379  | 0.455 | -2.128  | 0.033  | 0.281                         | 33     | -1.200 | 0.230   | 0.074  | 11     | 0.622  | 0.508  | 0.044  | 0.804 | 0.999  |       |       |       |
| 9    | 10  | 11                      | 12   | 13 | G       | C      | A                           | C    | A | 0.342   | 54     | -1.398                    | 0.165 | -     | 0.342   | 54     | -1.398                      | 0.165 | 0.416 | 0.247   | -3.290 | 0.0007                 | 0.354  | 0.252 | -1.905  | 0.056  | 0.087                         | 14     | 1.201  | 0.230   | 0.335  | 33     | -      | -      | -      | -     | 0.682  | 0.485 |       |       |
| 9    | 10  | 11                      | 12   | 13 | G       | C      | A                           | C    | A | 0.125   | 28     | -0.791                    | 0.429 | -     | 0.349   | 50     | 2.424                       | 0.015 | 0.256 | 0.251   | -0.258 | 0.796                  | 0.139  | 0.151 | 0.535   | 0.592  | 0.091                         | 13     | 1.262  | 0.207   | 0.343  | 40     | -0.173 | 0.863  | -      | -     |        |       |       |       |
| 9    | 10  | 11                      | 12   | 13 | G       | C      | A                           | C    | A | 0.032   | 13     | 2.034                     | 0.042 | -     | 0.056   | 23     | 1.634                       | 0.102 | 0.056 | 0.243   | -3.468 | 0.00052                | 0.334  | 0.325 | -1.887  | 0.059  | 0.164                         | 13     | 0.672  | 0.501   | 0.068  | 12     | -0.241 | 0.810  | -      | -     |        |       |       |       |
| 10   | 11  | 12                      | 13   | 14 | A       | C      | A                           | C    | T | 0.394   | 54     | 1.681                     | 0.103 | 0.057 | 0.344   | 63     | -2.420                      | 0.016 | 0.405 | 0.254   | -3.098 | 0.0020                 | 0.372  | 0.452 | -2.108  | 0.036  | 0.227                         | 37     | 0.687  | 0.492   | 0.867  | 0.987  | -      | -      | -      | -     | 0.987  |       |       |       |
| 10   | 11  | 12                      | 13   | 14 | A       | C      | A                           | C    | T | 0.033   | 13     | 2.014                     | 0.044 | -     | 0.05    |        |                             |       |       |         |        |                        |        |       |         |        |                               |        |        |         |        |        |        |        |        |       |        |       |       |       |
